# Supplementary material for: The Importance of Systematically Reporting and Reflecting on eHealth Development: Participatory Development Process of a Virtual Reality Application for Forensic Mental Health Care
Source: PubMed Central journal article supplement (PMC6718085; doi:10.2196/12972), 2019-08-19
Supplement: jmir_v21i8e12972_app1.pdf [file jmir_v21i8e12972_app1.pdf]

# Multimedia Appendix 1 – Main results of the research methods

## Appendix 1.1 - A visualization of the identified stakeholders

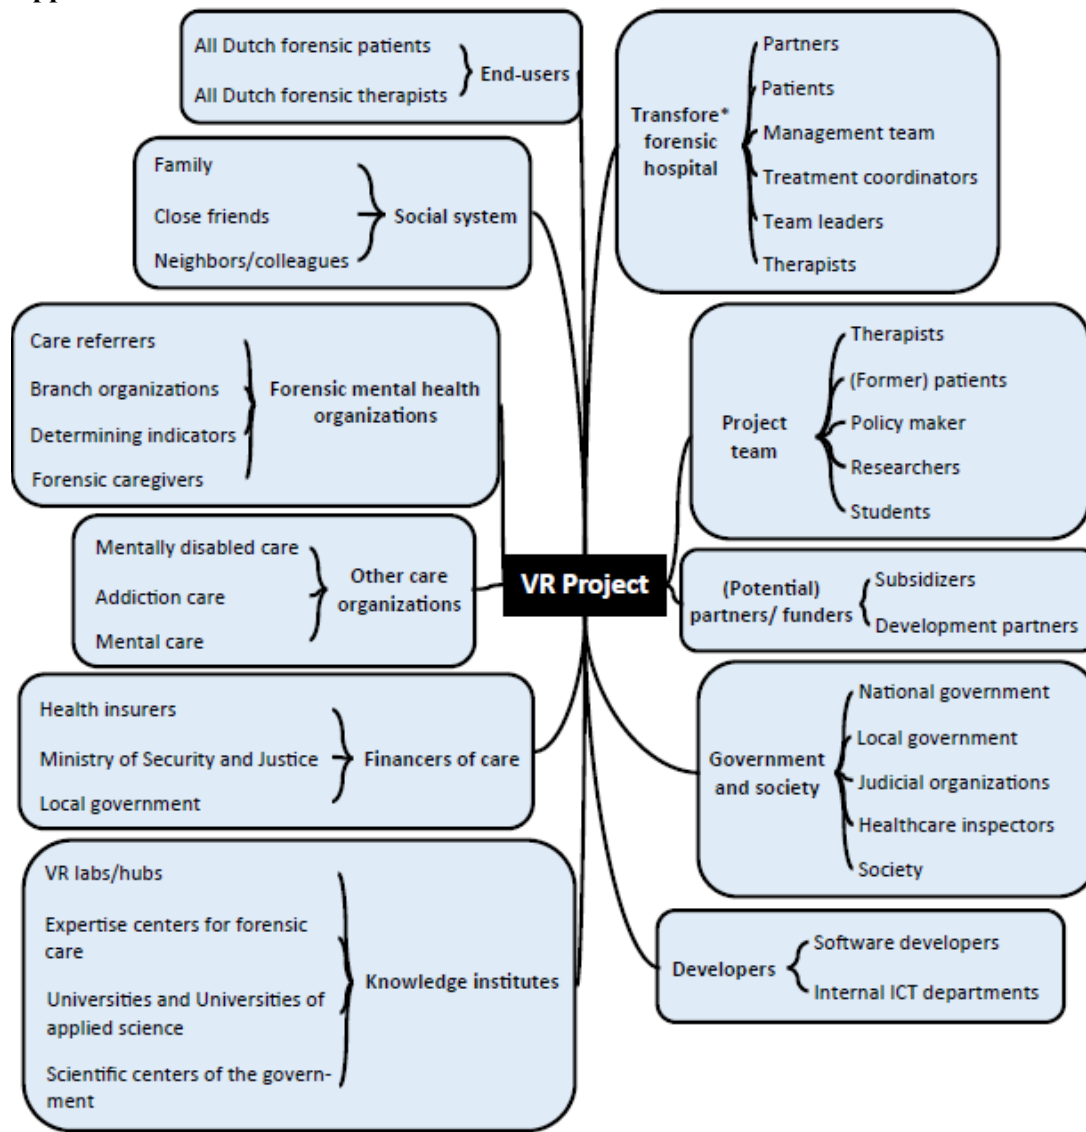

\*Transfore is the forensic hospital in which the current project was initiated and mostly took place.

Figure 1.1. An abridgement of the stakeholder identification

## Appendix 1.2 – Template used in the focus groups

Table 1.1. The template that participants in the focus groups filled in.

| How could virtual reality support you or other people in treatment at Transfore? |                           |                               |
|----------------------------------------------------------------------------------|---------------------------|-------------------------------|
| For who? What's the target group?                                                | What should it look like? | What could one learn from it? |
|                                                                                  |                           |                               |
|                                                                                  |                           |                               |

## Appendix 1.3 - The main results of the focus groups

Table 1.2. The four main categories and accompanying sub categories of the focus group's outcomes.

| Skill                     | Insight                                         | Treatment of disorder | Design                |
|---------------------------|-------------------------------------------------|-----------------------|-----------------------|
| Daily living skills       | Patient observes own                            | Anxiety               | Importance of realism |
| Skills related to offense | behaviour from other's perspective              | Psychosis             | Personalization       |
|                           | The other person observes patient's perspective | Depression            |                       |
|                           | Delinquent behaviour in realistic situation     | Autism                |                       |

## Appendix 1.4 - The main results of the interview study of the current situation

Table 1.3. Points of improvements and possibilities of VR according to therapists (Ther.; n=8) and patients (Pat.; n=3), and the total number of interviews in which the code was identified (Tot.)

| Main and sub codes                                             | Total | Therapists (n=8) | Patients (n=3) |
|----------------------------------------------------------------|-------|------------------|----------------|
| <b><u>Point of improvements of the current treatment</u></b>   |       |                  |                |
| <b>Characteristics of the forensic setting</b>                 |       |                  |                |
| Return to society – emotions and cognitions                    | 3     | 3                |                |
| Return to society – skills                                     | 4     | 4                |                |
| Return to society - recidivism                                 | 6     | 5                | 1              |
| <b>Patient characteristics</b>                                 |       |                  |                |
| Treatment motivation                                           | 4     | 4                |                |
| Patients' low educational level                                | 4     | 4                |                |
| Emotion regulation                                             | 5     | 5                |                |
| <b>Treatment characteristics</b>                               |       |                  |                |
| Skills training in context                                     | 7     | 6                | 1              |
| Therapist's insight in patient                                 | 5     | 4                | 1              |
| Exposure therapy                                               | 3     | 3                |                |
| Physical activity                                              | 2     | 2                |                |
| Involvement of significant others                              | 3     | 2                | 1              |
| <b><u>Possibilities of VR to improve current treatment</u></b> |       |                  |                |
| <b>Skills training with interaction</b>                        |       |                  |                |
| Training daily living skills                                   | 5     | 5                |                |
| Training social skills                                         | 6     | 5                | 1              |
| Training emotion regulation skills                             | 9     | 8                | 1              |
| <b>Observing without interaction</b>                           |       |                  |                |
| Exposure to emotion-eliciting stimuli                          | 9     | 6                | 3              |
| Observing daily life                                           | 2     | 1                | 1              |
| Observing behaviour                                            | 8     | 6                | 2              |
| <b>Creating insight for others</b>                             |       |                  |                |
| Insight into reactions to triggers                             | 5     | 5                |                |
| Insight into patient's situation                               | 7     | 5                | 2              |

## Appendix 1.5 – Template for the development of video scenarios used by the members of the project team

|                                                                                                                                                                                                                                                                                                                                                                                                                                                                                                                                                                |
|----------------------------------------------------------------------------------------------------------------------------------------------------------------------------------------------------------------------------------------------------------------------------------------------------------------------------------------------------------------------------------------------------------------------------------------------------------------------------------------------------------------------------------------------------------------|
| <b>Template for development of video scenarios</b>                                                                                                                                                                                                                                                                                                                                                                                                                                                                                                             |
| <b>Part 1: Underlying concept</b>                                                                                                                                                                                                                                                                                                                                                                                                                                                                                                                              |
| <i>Please describe here the core of the VR idea in a way that is understandable for (almost) all therapists and patients. This core should be based on one of the six concepts that were created by the project team in the last meeting. This text will be used in the questionnaire, so try to keep it as clear and concise as possible. This part should really focus on the abstract concept behind the VR application, so don't give any examples yet.</i>                                                                                                |
| <b>Part 2: Concrete explanation</b>                                                                                                                                                                                                                                                                                                                                                                                                                                                                                                                            |
| <i>The second part of the presentation of the concept consists of a short video in which an example of a VR application is presented to illustrate the previously described underlying concept. Please describe here, for the project team, briefly the idea that you will be presenting in the video. You can do this via written text, since this part will serve as background information for the project team and will not be used in the questionnaire.</i>                                                                                              |
| <b>Part 3: Elaboration of video script</b>                                                                                                                                                                                                                                                                                                                                                                                                                                                                                                                     |
| <i>Please add a draft script of the video here, if possible, with drawings, pictures or photo's to further clarify. You can do this via a storyboard from which the storyline and design of the video become apparent. It should become clear what type video it will become (e.g. animation, Claymation, 'real' film) and what the content is. Also think about matters as whether or not spoken text is necessary, what the voice-over text should be, and how long the video will approximately take. Try to provide as much detail on the final video.</i> |

## Appendix 1.6 - An example of a scenario with screenshots of the video

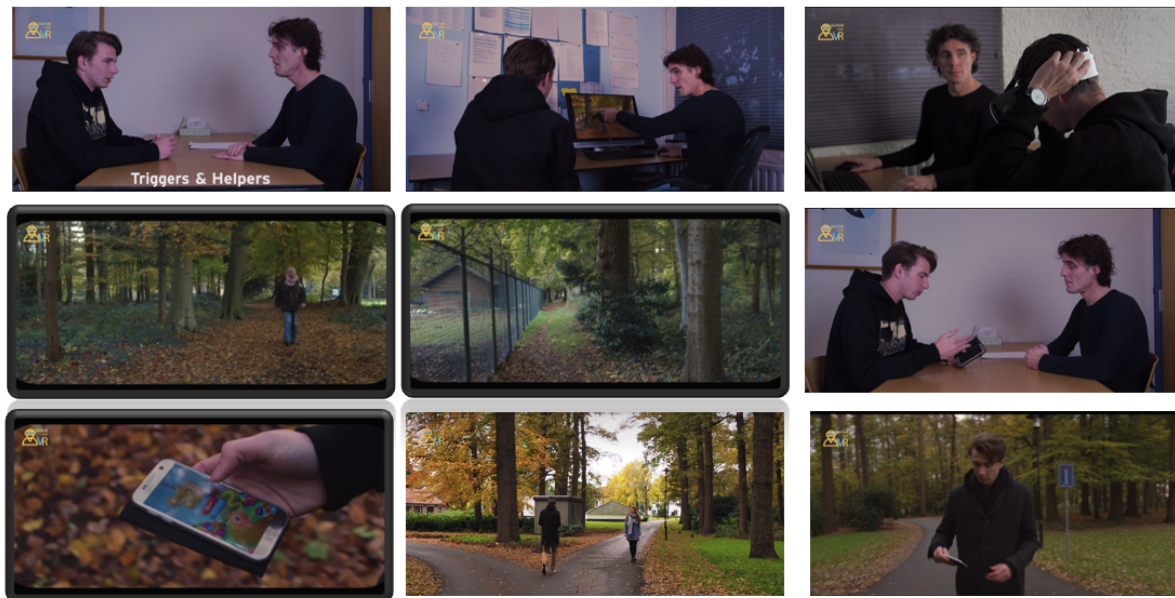

Figure 1.2. Screenshots from video 1, ‘Triggers & helpers’: a patient and therapist are discussing difficult situations and associated triggers, in this case running into a woman. The patient is exposed to this situation in VR and afterwards, patient and therapist are discussing what might help him in dealing with the trigger. The patient practices with using a phone as a helper in VR, and the video ends with a real-life situation in which the patient has transferred the skill and actually uses his phone as a helper.

## Appendix 1.7 - The main results of the questionnaire study

Table 1.4. The codes of the answers to the three open questions, structured by the five main codes that were identified in all three questions.

| Judgement                                                          | Therapist/<br>treatment                                                                                                                              | Patient                                                                                                                                                           | Content                                                                                                                             | Practical                                                                                                                                                                |
|--------------------------------------------------------------------|------------------------------------------------------------------------------------------------------------------------------------------------------|-------------------------------------------------------------------------------------------------------------------------------------------------------------------|-------------------------------------------------------------------------------------------------------------------------------------|--------------------------------------------------------------------------------------------------------------------------------------------------------------------------|
| <b><u>Positive remarks</u></b>                                     |                                                                                                                                                      |                                                                                                                                                                   |                                                                                                                                     |                                                                                                                                                                          |
| Positive judgement without explanation                             | Good addition to therapy; safe practicing; good exercise; insight into behaviour patient; cause for conversation; good addition to current treatment | Improvement (future) behaviour; insight own behaviour; insight behaviour others; treatment motivation; suitable for specific target group; supporting in reliving | Realism of behaviour; personalisation of persons, scenario & environment                                                            | Visual realism; new, different technology                                                                                                                                |
| <b><u>Negative remarks</u></b>                                     |                                                                                                                                                      |                                                                                                                                                                   |                                                                                                                                     |                                                                                                                                                                          |
| Negative judgement without substantiation                          | Not or difficult to use in treatment; not of added value to current treatment                                                                        | Dishonesty about effect; dishonesty about input scenario; not suitable for specific group; no effect; elicitation negative feelings                               | Not generalizable to real life; important element is lacking; no realistic behaviour; use of VR is not necessary to reach same goal | No visual realism; hard to use; costs; takes time during treatment; takes time to learn to use                                                                           |
| <b><u>Suggestions</u></b>                                          |                                                                                                                                                      |                                                                                                                                                                   |                                                                                                                                     |                                                                                                                                                                          |
| Negative or positive recommendation about introduction in practice | Apply for specific type of treatment; good training of therapist; input for VR scenario should be well-prepared                                      | Check whether VR is suitable for patient; co-creation of scenario with patient; apply to specific target group                                                    | Combine ideas; use realistic situations; change an aspect of the application                                                        | Combine with other technologies; improve visual realism; offer plenty choices in persons, scenarios & environments; context use VR; posture use VR; constant development |

## Appendix 1.8 - An example of how a value was created

Table 1.5. An example of a table with foundations from earlier research, attributes and a value.

| Foundations                                                                                                                                                                                                                                                                                                                                                                 | Attributes                                                                                                                                                                                                                                                                                                                                                                                                                      | Value                 |
|-----------------------------------------------------------------------------------------------------------------------------------------------------------------------------------------------------------------------------------------------------------------------------------------------------------------------------------------------------------------------------|---------------------------------------------------------------------------------------------------------------------------------------------------------------------------------------------------------------------------------------------------------------------------------------------------------------------------------------------------------------------------------------------------------------------------------|-----------------------|
| <b>Codes interviews</b><br>Training daily living skills; Training social skills; Training emotion regulation skills; Skills training in context<br><b>Questionnaire</b><br>Good exercise; Safe practicing; Improvement (future) behaviour<br><b>Literature</b><br>Fromberger, Jordan & Muller (2014); Renaud et al. (2014)<br><b>Project team</b><br>Minutes meeting 8 & 10 | Stakeholders think it is important that... <ul style="list-style-type: none"> <li>• the patient can acquire or improve daily living skills</li> <li>• the patient can acquire or improve social skills</li> <li>• the patient can acquire or improve emotion regulation skills</li> <li>• interaction with a virtual other, played by the therapist, is possible</li> <li>• behaviour of virtual others is realistic</li> </ul> | Improvement of skills |

## Appendix 1.9 - Low fidelity prototype of the dashboard for the VR application

| 1. Environment                      |                                           |                                                          | 2. Virtual avatar of other person |                                                                                                                                  |                        |                                                             | 3. Stimuli to add to scenario |                                                                                      |
|-------------------------------------|-------------------------------------------|----------------------------------------------------------|-----------------------------------|----------------------------------------------------------------------------------------------------------------------------------|------------------------|-------------------------------------------------------------|-------------------------------|--------------------------------------------------------------------------------------|
| 1.1 Type of environment             | 1.2 Background sound (constantly present) | 1.3 Extra(s)                                             | 2.1 Basic appearance              | 2.2 Physical appearance                                                                                                          | 2.3 Facial expression* | 2.4 Posture and gestures                                    | 3.1 Auditory stimuli          | 3.2 Visual stimuli                                                                   |
| Pedestrian street during night-time | Buzzing of people                         | Drug dealer with small (bum) bag                         | Male/female                       | Length (enlarging/reducing) *                                                                                                    | Happy*                 | Punching gesture                                            | Ringing phone                 | Game on own phone                                                                    |
| Pedestrian street during daytime    | Loud talking                              | Large crowd of people (>10)                              | Age (6-80) *                      | Physique (skinny build/broadly build) *                                                                                          | Scared*                | Stopping gesture (hands forward)                            | Loud music                    | Bottles of alcohol/beer                                                              |
| Train                               | Sound of playing children                 | Loitering adolescents                                    |                                   | Ethnicity (white/north-African/African)                                                                                          | Neutral*               | Arms crossed                                                | Music by own choice           | One building that can be changed into coffee shop, liquor store, brothel or pharmacy |
| Living room                         | Background music                          | Playing children                                         |                                   | Proximity (far away, nearby) *                                                                                                   | Angry*                 | Anxious gestures: torso is moving, wobbling                 | Police sirens                 | Police car                                                                           |
| Generic desk                        | Volume of sound (decibel)*                | Someone observing the conversation of patient and avatar |                                   | Clothing woman<br>Normal sweater / short dress with cleavage / headscarf / top with panther print, large golden earrings, tattoo | Sad *                  | Arms alongside the body                                     | Crying baby                   | Sign with text that can be adapted/entered (e.g.: count to ten)                      |
| Park with fountain                  | Hertz of sound*                           | Two (attractive) females                                 |                                   |                                                                                                                                  | Ashamed*               | Shrinking movement/making posture smaller, arched shoulders | Screaming people              |                                                                                      |
| Supermarket                         |                                           | Several random people spread out over location           |                                   | Clothing man<br>Normal sweater or shirt / suit / tracksuit / wife beater or tank top with bare arms and tattoo                   |                        | Puffed out chest                                            | Barking dogs                  |                                                                                      |
| Car                                 |                                           | People drinking alcohol                                  |                                   |                                                                                                                                  |                        | Wild arm gestures                                           | Two fighting people           |                                                                                      |
| Forest                              |                                           | Two broad/strong-looking men                             |                                   |                                                                                                                                  |                        | Giving the middle finger                                    | Loudly ticking clock          |                                                                                      |
|                                     |                                           | Two skinny/weak-looking men                              |                                   |                                                                                                                                  |                        | Kicking movement                                            |                               |                                                                                      |
|                                     |                                           | Two officers                                             |                                   |                                                                                                                                  |                        | Tilted head (up or down)                                    |                               |                                                                                      |
|                                     |                                           | Family of four                                           |                                   |                                                                                                                                  |                        | Clenched fists                                              |                               |                                                                                      |
|                                     |                                           | Men walking while holding hands                          |                                   |                                                                                                                                  |                        | Pointing                                                    |                               |                                                                                      |
|                                     |                                           | Group of police officers (both male and female)          |                                   |                                                                                                                                  |                        |                                                             |                               |                                                                                      |

Figure 1.3. A lo-fi prototype of the dashboard for personalization of the VR application. The asterisks represent mean that this part of the dashboard is ‘adaptable’: it’s a scale instead of an ‘on or off’ option.

## Appendix 1.10 - The main results of the attitude-part of the idea finalization interviews

Table 1.6. The number of patients and therapists that positively mentioned one of the four constructs of the TAM

|                   | Positive attitude Towards idea | Perceived potential usefulness | Perceived potential ease of use | Positive intention to use |
|-------------------|--------------------------------|--------------------------------|---------------------------------|---------------------------|
| Patients (n= 10)  | 9                              | 9                              | 6                               | 5                         |
| Therapists (n =8) | 8                              | 8                              | 5                               | 8                         |
| Total (n=18)      | 17                             | 17                             | 11                              | 13                        |

## Appendix 1.11 - The main results of the value-part of the idea finalization interviews

Table 1.7. The number of interviews with therapists (n=8) and patients (n=10) that contained potential valuable aspects or points of attention related to a specific value

| Values                                        | Potential valuable aspects (positive) |             |             | Points of attention (negative) |             |             |
|-----------------------------------------------|---------------------------------------|-------------|-------------|--------------------------------|-------------|-------------|
|                                               | Total (n=18)                          | Ther. (n=8) | Pat. (n=10) | Total (n=18)                   | Ther. (n=8) | Pat. (n=10) |
| <b>Aim application</b>                        |                                       |             |             |                                |             |             |
| Fit with patient                              | 16                                    | 8           | 8           | 4                              | 3           | 1           |
| Bridge between therapy room and practice      | 14                                    | 7           | 7           | 4                              | 2           | 2           |
| Insight into behaviour, thoughts and feelings | 14                                    | 8           | 6           | 2                              | 1           | 1           |
| Improvement of skills                         | 7                                     | 5           | 2           | 0                              | 0           | 0           |
| Generalization of skills to daily life        | 5                                     | 4           | 1           | 2                              | 1           | 1           |
| Safety                                        | 1                                     | 1           | 0           | 5                              | 2           | 3           |
| Treatment motivation                          | 1                                     | 0           | 1           | 6                              | 2           | 4           |
| <b>Embedment in treatment</b>                 |                                       |             |             |                                |             |             |
| Unique addition to current treatment          | 13                                    | 6           | 7           | 1                              | 0           | 1           |
| Cooperation of patient and therapist          | 11                                    | 6           | 5           | 2                              | 1           | 1           |
| Content fits well with current treatment      | 6                                     | 5           | 1           | 2                              | 2           | 0           |
| Practically easy to use in current treatment  | 5                                     | 2           | 3           | 8                              | 7           | 1           |
| <b>Use application in practice</b>            |                                       |             |             |                                |             |             |
| Continuous adaptation of application          | 5                                     | 3           | 2           | 0                              | 0           | 0           |
| Widely applicable                             | 1                                     | 1           | 0           | 9                              | 4           | 5           |
| Affordability                                 | 0                                     | 0           | 0           | 2                              | 1           | 1           |
